# Supplementary material for: Association between VEGF Splice Isoforms and Progression-Free Survival in Metastatic Colorectal Cancer Patients Treated with Bevacizumab
Source: Oxford University Press journal article supplement (doi:10.1158/1078-0432.ccr-12-2223), 2012-10-26
Supplement: 10780432ccr122223-sup-f1_260k.pdf [file 10780432ccr122223-sup-f1_260k.pdf]

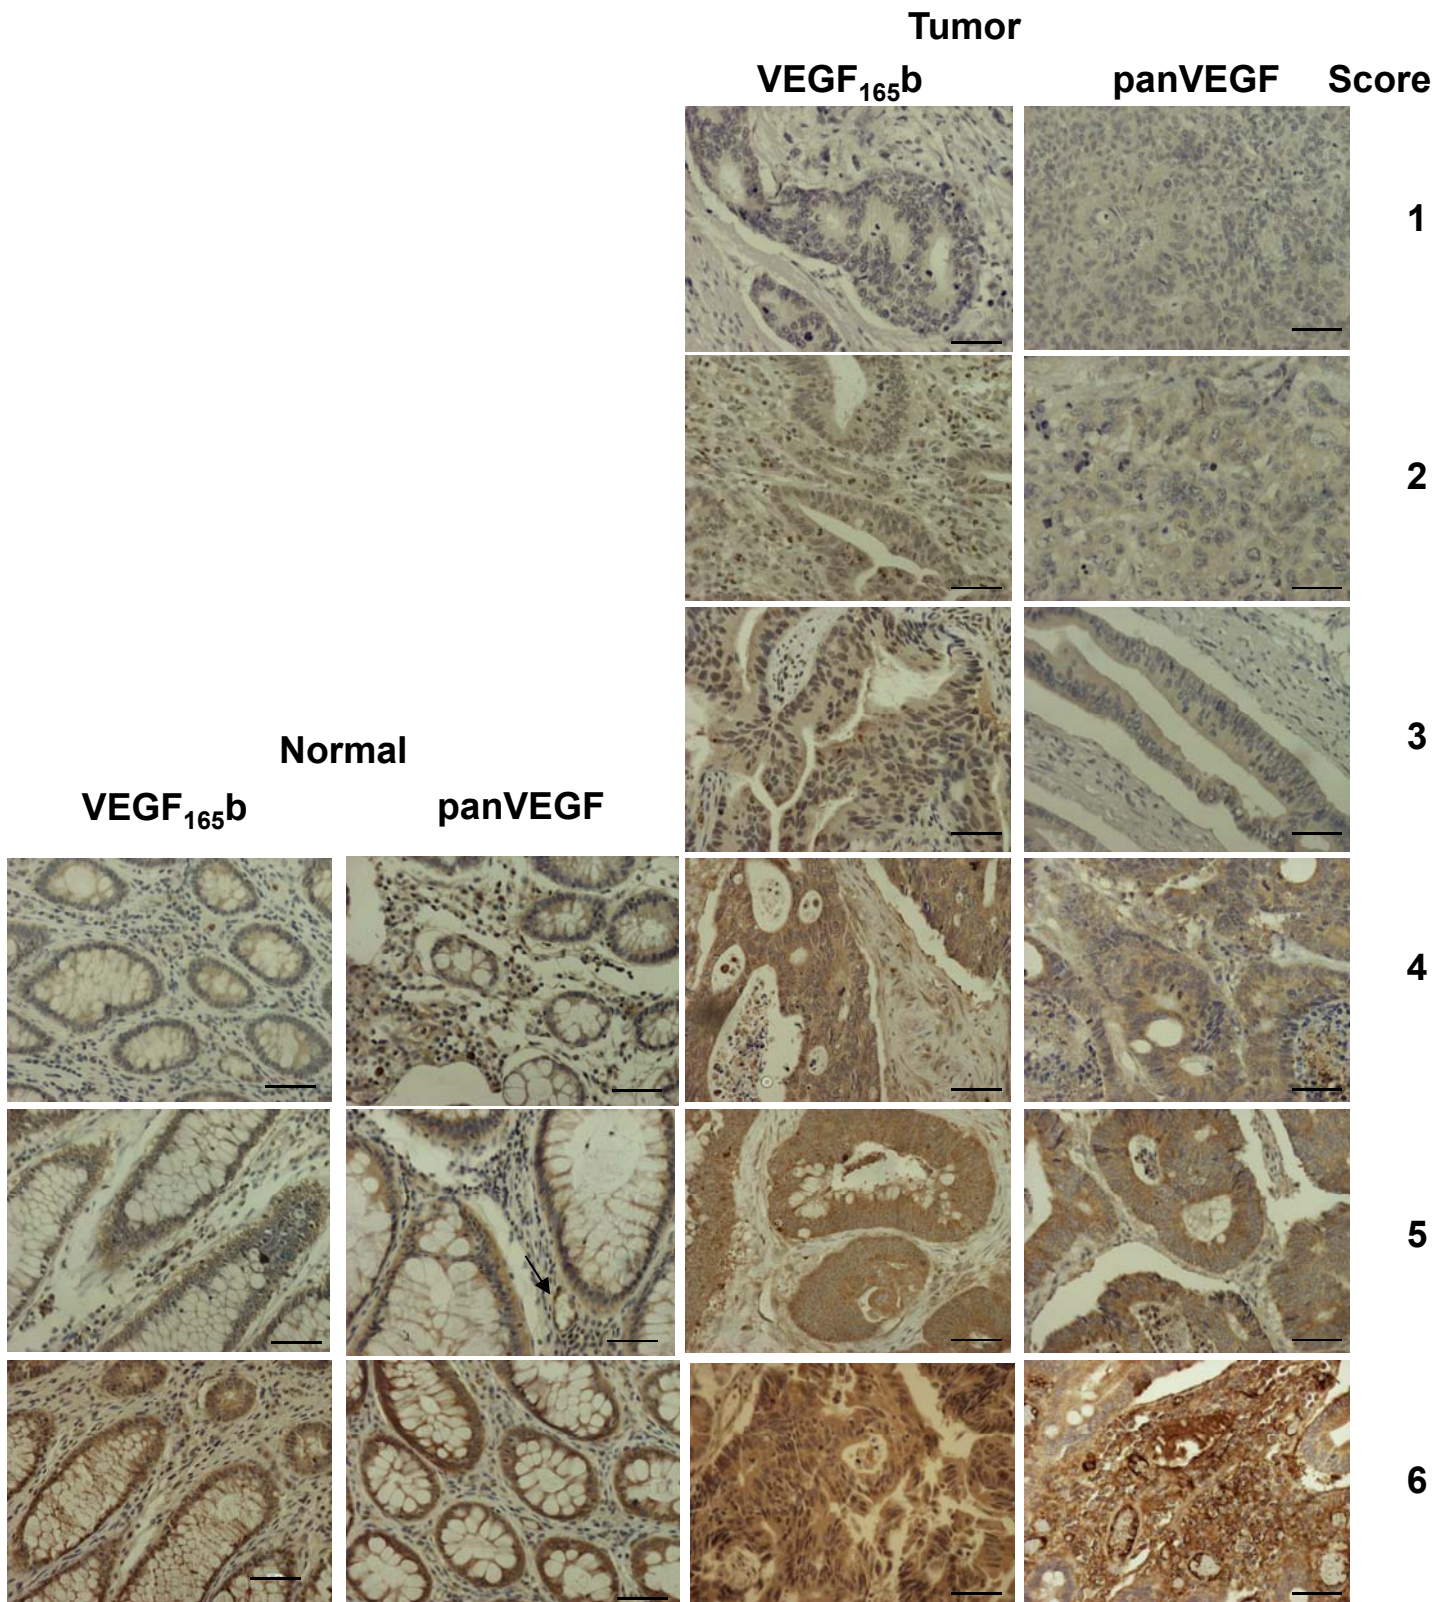

Supplementary figure 1. Scoring of immunohistochemically stained samples. Sections were stained for VEGF<sub>165</sub>b or pan-VEGF and visually scored according to a six point scoring system. Examples of scoring are shown. The intensity of staining in normal mucosa was assessed according to the intensity of the brown product in the crypts and the plasma cells. Tumor staining was judged according to intensity of staining in the tumor cells. For pan-VEGF staining was seen in the blood vessels (see arrow). Scale bar=50µm
